# Supplementary material for: Plasma biomarkers of neurodegeneration in patients and high risk subjects with Lewy body disease
Source: PubMed Central journal article supplement (PMC11292020; doi:10.1038/s41531-024-00745-8), 2024-07-31
Supplement: 41531_2024_745_MOESM1_ESM.pdf [file 41531_2024_745_MOESM1_ESM.pdf]

## **Supplemental material**

### **Plasma biomarkers of neurodegeneration in patients and high risk subjects with Lewy body disease**

Keita Hiraga, Makoto Hattori, Yuki Satake, Daigo Tamakoshi, Taiki Fukushima, Takashi Uematsu, Takashi Tsuboi, Maki Sato, Katsunori Yokoi, Keisuke Suzuki, Yutaka Arahata, Yukihiro Washimi, Akihiro Hori, Masayuki Yamamoto, Hideaki Shimizu, Masakazu Wakai, Harutsugu Tatebe, Takahiko Tokuda, Akinori Nakamura, Shumpei Niida, Masahisa Katsuno

#### **Contents:**

Supplementary Table: 1

Supplementary Figures: 5

**Supplementary Table 1. Background characteristics of the patients with Parkinson's disease by cognitive function**

|                                  | PD-CN         | PD-CI         | <i>p</i> value       |
|----------------------------------|---------------|---------------|----------------------|
| Number (M:F)                     | 40 (22:18)    | 44 (22:22)    | 0.668 <sup>a</sup>   |
| Age, years                       | 64.4 (9.0)    | 72.8 (7.8)    | < 0.001 <sup>b</sup> |
| Education, years                 | 13.6 (2.4)    | 12.9 (3.5)    | 0.284 <sup>b</sup>   |
| DaT abnormal, %                  | 23/23 (100)   | 20/20 (100)   | 1.000 <sup>a</sup>   |
| MIBG abnormal, %                 | 21/26 (80.8)  | 20/22 (90.9)  | 0.429 <sup>a</sup>   |
| DaT and/or MIBG abnormal, %      | 33/33 (100)   | 29/29 (100)   | 1.000 <sup>a</sup>   |
| Disease duration, years          | 6.3 (5.0)     | 5.5 (4.9)     | 0.582 <sup>c</sup>   |
| MoCA-J                           | 27.6 (1.3)    | 21.7 (3.5)    | < 0.001 <sup>c</sup> |
| Stroop test part 2 - part 1, sec | 12.8 (7.5)    | 30.0 (45.2)*  | 0.062 <sup>c</sup>   |
| Line orientation test            | 17.2 (2.1)    | 14.5 (3.0)    | < 0.001 <sup>c</sup> |
| Hoehn and Yahr                   | 1.9 (0.8)     | 2.3 (1.0)     | 0.222 <sup>c</sup>   |
| LEDD                             | 423.6 (449.6) | 384.3 (327.1) | 0.654 <sup>c</sup>   |
| MDS-UPDRS III                    | 22.6 (9.8)    | 27.2 (10.3)   | 0.121 <sup>c</sup>   |
| Rigidity                         | 3.2 (2.5)     | 3.9 (3.5)     | 0.701 <sup>c</sup>   |
| Tremor                           | 3.6 (4.0)     | 3.9 (4.4)     | 0.754 <sup>c</sup>   |
| Bradykinesia                     | 11.8 (5.4)    | 13.2 (5.7)    | 0.093 <sup>c</sup>   |
| Axial signs                      | 4.0 (3.4)     | 6.2 (3.8)     | 0.074 <sup>c</sup>   |
| SCOPA-AUT                        | 10.5 (7.0)    | 12.5 (9.4)    | 0.077 <sup>c</sup>   |
| SAOQ, %                          | 65.1 (38.3)   | 70.4 (35.1)   | 0.343 <sup>c</sup>   |
| RBDSQ                            | 3.3 (2.1)     | 4.6 (3.2)     | 0.034 <sup>c</sup>   |
| BDI-II                           | 8.8 (5.8)     | 10.7 (6.8)    | 0.045 <sup>c</sup>   |
| ESS                              | 8.0 (4.6)     | 7.8 (5.1)     | 0.205 <sup>c</sup>   |
| PDQ-39 summary index             | 15.8 (11.5)   | 22.7 (17.9)   | 0.005 <sup>c</sup>   |
| QUIP                             | 0.3 (0.8)     | 0.5 (1.0)     | 0.038 <sup>c</sup>   |

Patients with PD with MoCA-J  $\geq$  26 and < 26 are classified as cognitively normal (PD-CN) and cognitively impaired (PD-CI), respectively

PD, Parkinson's disease; DaT, dopamine transporter; MIBG, metaiodobenzylguanidine; MoCA-J, the Japanese version of the Montreal Cognitive Assessment; LEDD, Levodopa equivalent daily dose; MDS-UPDRS, Movement Disorder Society-Unified Parkinson's Disease Rating Scale; SCOPA-AUT, the Japanese version of the Scale for Outcomes in Parkinson's disease for Autonomic Symptoms; SAOQ, Self-administered Odor Question; RBDSQ, RBD screening scale; BDI-II, Beck Depression Inventory-Second

Edition; ESS, Epworth Sleepiness Scale; PDQ-39, Parkinson's Disease Questionnaire-39; QUIP, Questionnaire for Impulsive-Compulsive Disorders in Parkinson's disease

\*Two patients with PD patients could not complete the Stroop test

<sup>a</sup>*p* values determined by Fisher's exact test

<sup>b</sup>*p* values determined by Student's *t*-test

<sup>c</sup>*p* values determined by analysis of covariance (ANCOVA) adjusted for age and sex

Data represent the mean (standard deviation) or value (%)

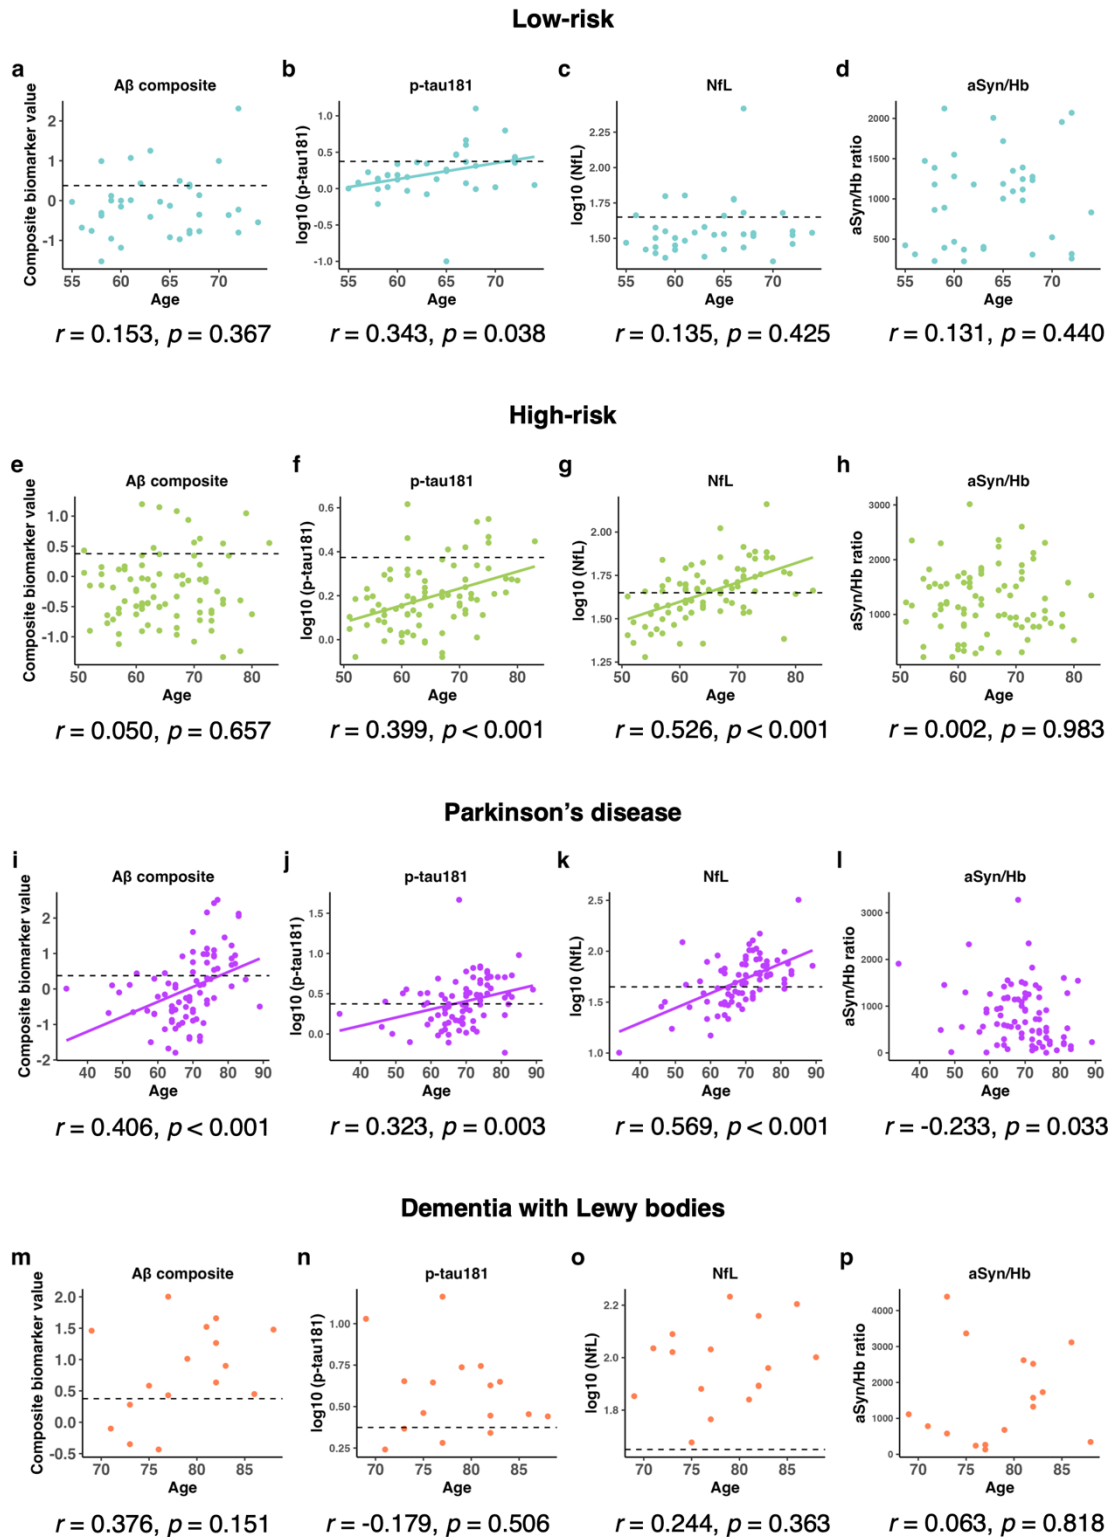

**Supplementary Figure 1.** Pearson's correlation test between plasma biomarkers and age in the low-risk group (a–d), high-risk group (e–h), Parkinson's disease group (i–l), and dementia with Lewy bodies group (m–p). The cut-off values for Aβ composite, log<sub>10</sub> (p-tau181), and log<sub>10</sub> (NfL) are indicated by dotted lines (Aβ composite, 0.376; log<sub>10</sub> [p-tau181], 0.374; log<sub>10</sub>

[NfL], 1.65). A $\beta$  composite, combination biomarker of amyloid-beta precursor protein (APP)<sub>669-711</sub>/amyloid-beta (A $\beta$ )<sub>1-42</sub> and A $\beta$ <sub>1-40</sub>/A $\beta$ <sub>1-42</sub> ratios; p-tau181, phosphorylated tau 181; NfL, neurofilament light chain; aSyn/Hb, alpha-synuclein/hemoglobin ratio

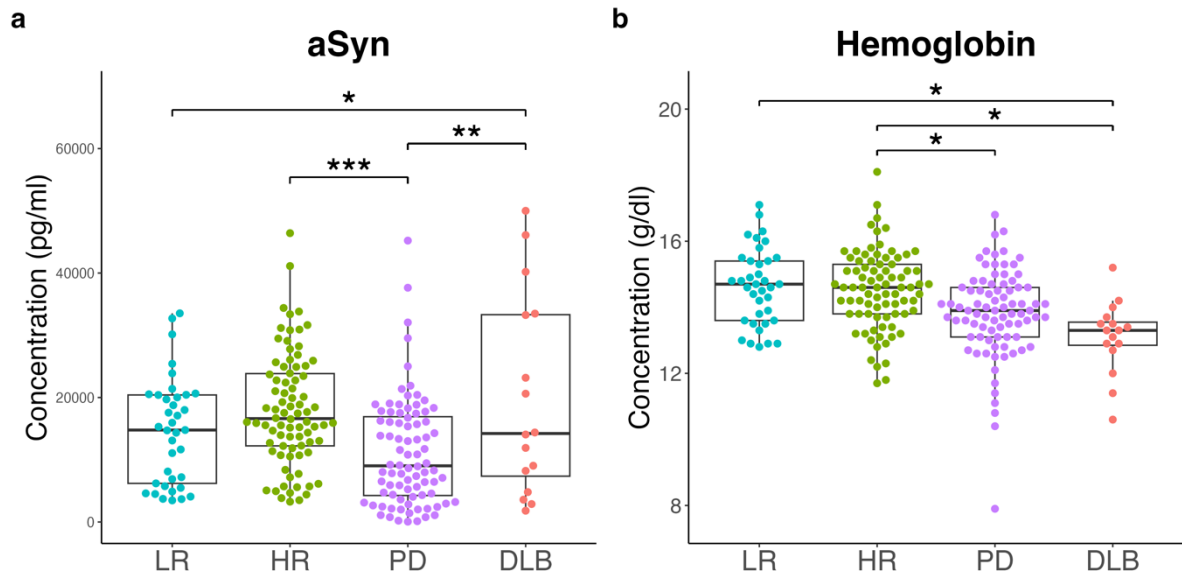

**Supplementary Figure 2.** Levels of aSyn (a) and hemoglobin (b) are plotted with individual values and boxplots across diagnostic groups. Analysis of covariance (ANCOVA) adjusted for age and sex is used to determine  $p$  values visualized with  $***p < 0.001$ ,  $**p < 0.01$ ,  $*p < 0.05$ . aSyn, alpha-synuclein; LR, low-risk; HR, high-risk; PD, Parkinson's disease; DLB, dementia with Lewy bodies.

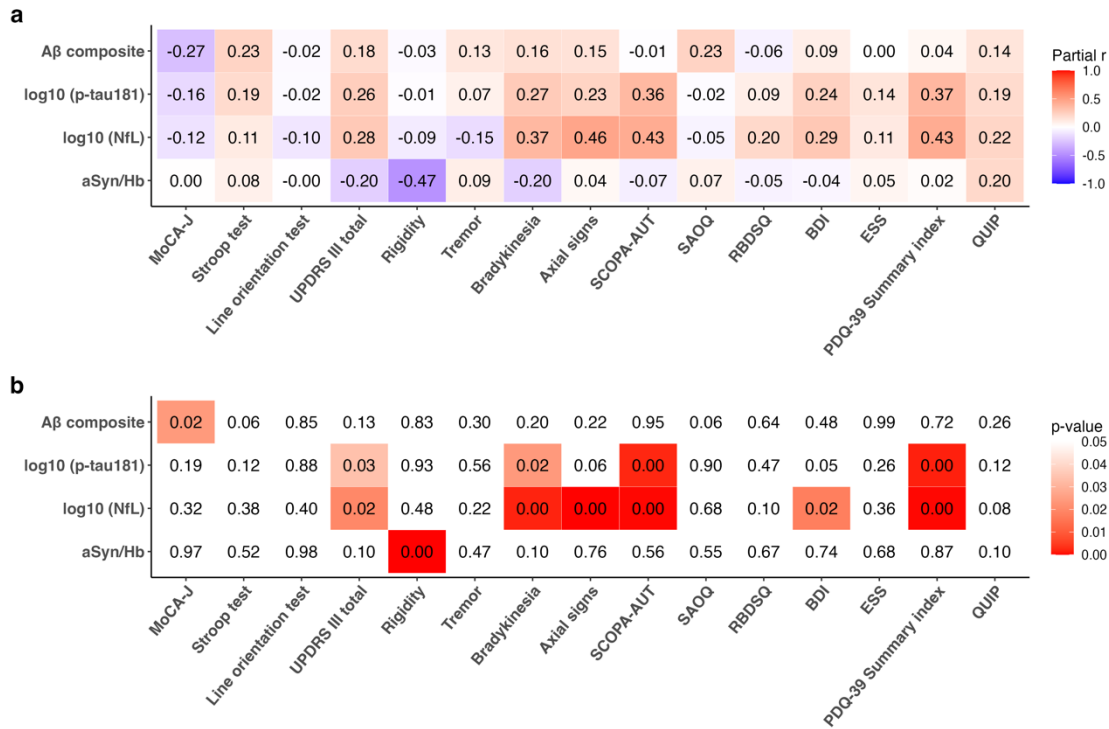

**Supplementary Figure 3.** Age-adjusted Pearson's partial correlation test between plasma biomarkers and clinical indices in the Parkinson's disease group. Partial correlation coefficients (a) and *p* values (b) are shown. Aβ composite, combination biomarker of amyloid-beta precursor protein (APP)<sub>669-711</sub>/amyloid-beta (Aβ)<sub>1-42</sub> and Aβ<sub>1-40</sub>/Aβ<sub>1-42</sub> ratios; p-tau181, phosphorylated tau 181; NfL, neurofilament light chain; aSyn/Hb, alpha-synuclein/hemoglobin ratio; MoCA-J, the Japanese version of the Montreal Cognitive Assessment; UPDRS, Movement Disorder Society-Unified Parkinson's Disease Rating Scale; SCOPA-AUT, the Japanese version of the Scale for Outcomes in Parkinson's disease for Autonomic Symptoms; SAOQ, Self-administered Odor Question; RBDSQ, RBD screening scale; BDI-II, Beck Depression Inventory-Second Edition; ESS, Epworth Sleepiness Scale; PDQ-39, Parkinson's Disease Questionnaire-39; QUIP, Questionnaire for Impulsive-Compulsive Disorders in Parkinson's disease

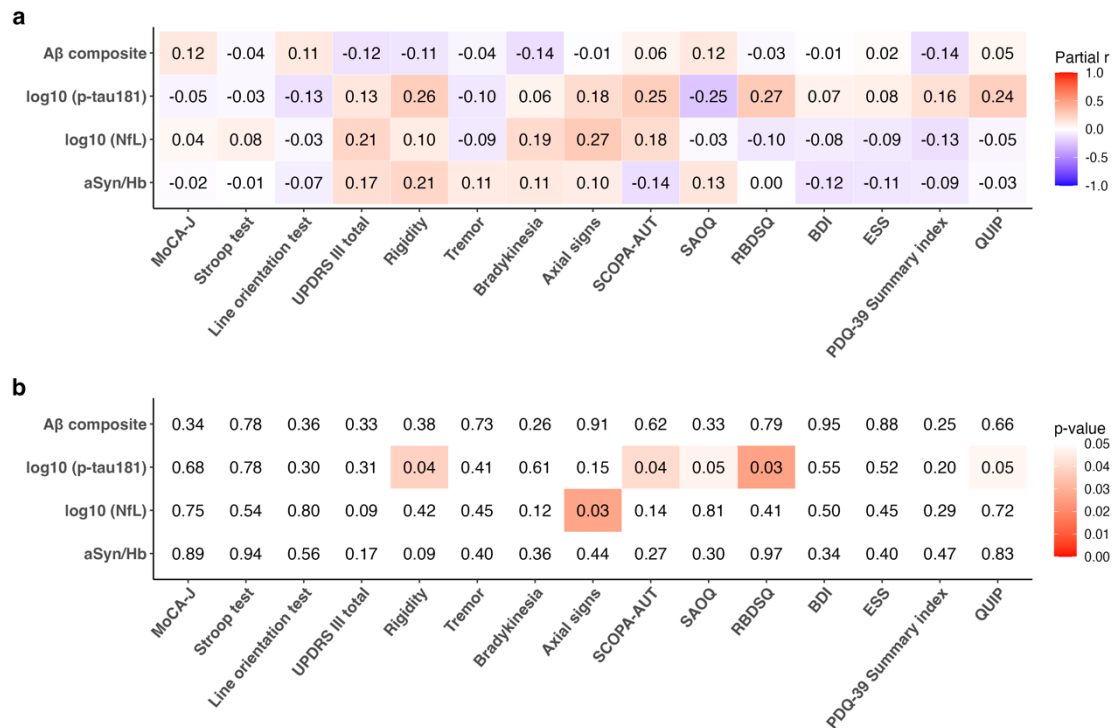

**Supplementary Figure 4.** Age-adjusted Pearson's partial correlation test between plasma biomarkers and clinical indices in the high-risk group. Partial correlation coefficients (a) and  $p$  values (b) are shown. A $\beta$  composite, combination biomarker of amyloid-beta precursor protein (APP)<sub>669-711</sub>/amyloid-beta (A $\beta$ )<sub>1-42</sub> and A $\beta$ <sub>1-40</sub>/A $\beta$ <sub>1-42</sub> ratios; p-tau181, phosphorylated tau 181; NfL, neurofilament light chain; aSyn/Hb, alpha-synuclein/hemoglobin ratio; MoCA-J, the Japanese version of the Montreal Cognitive Assessment; UPDRS, Movement Disorder Society-Unified Parkinson's Disease Rating Scale; SCOPA-AUT, the Japanese version of the Scale for Outcomes in Parkinson's disease for Autonomic Symptoms; SAOQ, Self-administered Odor Question; RBDSQ, RBD screening scale; BDI-II, Beck Depression Inventory-Second Edition; ESS, Epworth Sleepiness Scale; PDQ-39, Parkinson's Disease Questionnaire-39; QUIP, Questionnaire for Impulsive-Compulsive Disorders in Parkinson's disease



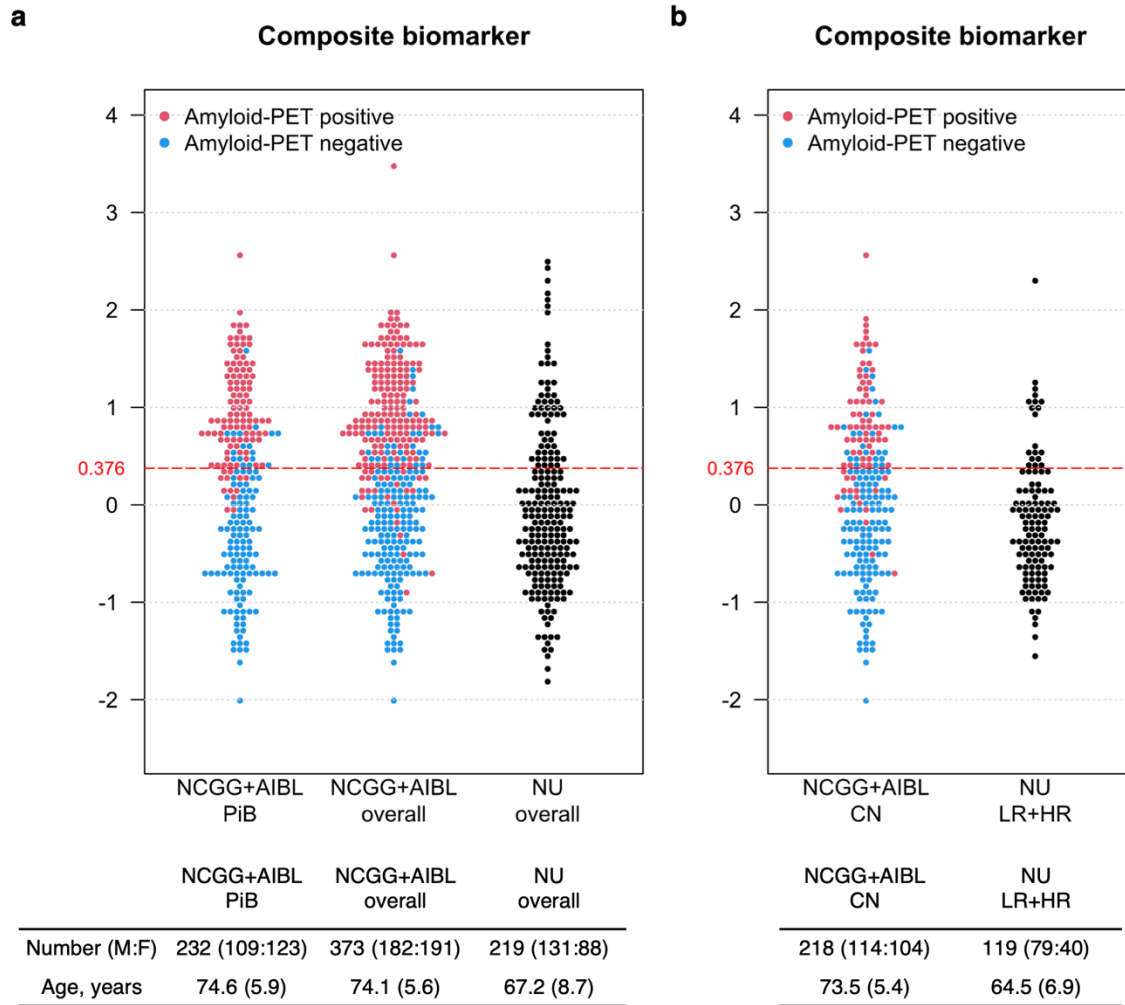

**Supplementary Figure 5.** A $\beta$  composite levels in the current cohort (NU) compared to historical cohorts (NCGG and AIBL) in all participants (a) and cognitively normal (CN) participants (b). The cut-off value for the A $\beta$  composite is indicated by the dotted line (0.376). Composite biomarker, combination biomarker of amyloid-beta precursor protein (APP)<sub>669-711</sub>/amyloid-beta (A $\beta$ )<sub>1-42</sub> and A $\beta$ <sub>1-40</sub>/A $\beta$ <sub>1-42</sub> ratios; PiB, Pittsburgh compound-B-amyloid positron emission tomography; NCGG, National Center for Geriatrics and Gerontology; AIBL, the Australian Imaging, Biomarker and Lifestyle Study of Aging; NU, Nagoya University. Data of age represent the mean (standard deviation).
